# Supplementary material for: Modelling the artificial forest (Robinia pseudoacacia L.) root-soil water interactions in the Loess Plateau, China
Source: Copernicus journal article supplement (doi:10.5194/hess-2021-304), 2021-06-23
Supplement: Supplementary file 1 [file Literature data.xlsx]

## Sheet: 1_Title page
Title: Modelling the artificial forest (Robinia pseudoacacia L.) root-soil water interactions in the Loess Plateau, China
Author names: Hongyu Li1,2, Yi Luo1,2,3, Lin Sun1, Xiangdong Li4, Changkun Ma5, Xiaolei Wang1,2, Ting Jiang1,2, Haoyang Zhu1,2
Author addresses:
1 Key Laboratory of Ecosystem Network Observation and Modeling, Institute of Geographic Sciences and Natural Resources Research, Chinese Academy of Sciences, Beijing, 100101, China
2 University of Chinese Academy of Sciences, Beijing, 100049, China
3 Research Centre for Ecology and Environment of Central Asia, Chinese Academy of Sciences, Urumqi, 830011, China
4 Guangdong Key Laboratory of Integrated Agro-environmental Pollution Control and Management, Guangdong Institute of Eco-environmental Science & Technology, Guangzhou, 510650, China
5 State Key Laboratory of Eco-hydraulics in Northwest Arid Region, Xi'an University of Technology, Xi'an, 710048, China
Corresponding author name: Yi Luo Contact; address: 11A, Datun Road, Chaoyang District, Beijing, 100101, China; Telephone/fax number: +86-10-6488-8920; E-mail: luoyi@igsnrr.ac.cn
SUPPORTING INFORMATION
Supplenment The collected dataset of the available peer-reviewed publications about fine root distribution,soil water content of black locust forestland of Loess Plateau in this study
Methods: WebPlotDigitizer (https://automeris.io/WebPlotDigitizer) for extracting relevant available data from paper figures.

## Sheet: 2_references
	Reference	Authors	Title	Year	Journal	Page	Language	Locations	Longitude (E)	Latitude (N)	Stand ages (yr)	Aspect Characterization	Replications	Index	Samling depth (cm)	Samling methods	Criteria fo fine root diameter classfication
Fine root distribution	1	Zhao, Z., Li, P., Wang, N.J.,	Distribution patterns of root systems of main planting tree species in Weibei Loess Plateau	2000	Chinese Journal Of Applied Ecology	11 (1), 37-39	in Chinese with English abstract	Chunhua, shaanxi	108.683	34.8	24	Yes	2*2	Fine root biomass density	190	Soil coring	< 3 mm
	2	Li, P., Zhao, Z., Li, Z.B., Wang, N.J.,	Research on Root Distribution Parameters of Robinia pseudoacacia on Different Sites in Chunhua County	2002	Journal of Nanjing Forestry University (Natural Sciences Edition)	26 (5), 32-36	in Chinese with English abstract	Chunhua, shaanxi	108.683	34.8	24	Yes	2*2	Fine root biomass density	200	Soil coring	< 3 mm
	3	Xue, W.P., Zhao, Z., Li, P., Cao, Y.,	Researches on root distribution characteristics of Robinia pseudoacacia stand in Wangdonggou on different site conditions	2003	Jour. of North west Sci-Tech Univ. of Agri. and For. (Nat. Sci. Ed.)	31 (6), 27-32	in Chinese with English abstract	Changwu, shaanxi	107.7	35.2	25	Yes	5*2	Fine root surface area density, length density	200	Soil coring	< 1 mm
	4	Li, P., Zhao, Z., Li, Z.B., Zhan, T.Z.,	Characters of root biomass spatial distribution of Robinia pseudoacacia in Weibei loess areas	2005	Ecology and Environment	14 (3), 405-409	in Chinese with English abstract	Changwu, shaanxi	107.7	35.2	25	Yes	6*2	Fine root biomass density	200	Soil coring	< 1 mm
	5	Cao, Y., Zhao, Z., Qu, M., Cheng, X.R., Wang D.H.,	Effects of Robinia pseudoacacia roots on deep soil moisture status	2006	Chinese Journal of Applied Ecology	17 (5), 765-768	in Chinese with English abstract	Changwu, shaanxi	107.7	35.2	25	Yes	4*2	Fine root surface area density	200	Soil coring	< 2 mm
	6	Chen W.Q., Li, P., Zhang, L.E.,	Researches on Fine Root Dynamics in Robinia pseudoacacia Forest and Its Response with Soil Moisture	2009	Research of Soil and Water Conservation	16 (6), 92-101	in Chinese with English abstract	Changwu, shaanxi	107.7	35.2	25	Yes	6*2	Fine root biomass density	200	Soil coring	< 1 mm
	7	Hu, X.N., Zhao, Z., Yuan, Z.F., Li, J., Guo, M.C., Wang, D.H.,	A Model for Fine Root Growth of Robinia pseudoacacia in the Loess Plateau	2010	Scientia Silvae Sinicae	46 (4), 126-132	in Chinese with English abstract	Jingchuan, Gansu	107.8	35.15	25	Yes	8*2	Fine root surface area density	200	Soil coring	< 2 mm
	8	Zhang Z. , Huang M. , Zhang Y .	Vertical distribution of fine-root area in relation to stand age and environmental factors in black locust (Robinia pseudoacacia) forests of the Chinese Loess Plateau	2018	CANADIAN JOURNAL OF FOREST RESEARCH	48 (10), 1148-1158	in English	Changwu, shaanxi	107.7	35.2	8, 15, 22, 40	No	3*4	Fine root surface area density	300	Soil coring	< 2 mm
Fine root distribution (FR)	1	Zhao, Z., Li, P. and Wang, N.J., 2004. Study on relations of growth and vertical distribution of fine root system of main planting tree species to soil density in the Weibei Loess Plateau. Scientia Silvae Sinicae, 40(5): 50-55 (in Chinese with English abstract).
	2	Li, P., Zhao, Z., Li, Z.B. and Zhan, T.Z., 2005. Characters of root biomass spatial distribution of Robinia pseudoacacia in Weibei loess areas. Ecology and Environment, 14(3): 405-409 (in Chinese with English abstract).
	3	Xue, W.P., Zhao, Z., Li, P. and Cao, Y., 2003. Researches on root distribution characteristics of Robinia pseudoacacia stand in Wangdonggou on different site conditions. Jour. of North west Sci-Tech Univ. of Agri. and For. (Nat. Sci. Ed.), 31(6): 27-32 (in Chinese with English abstract).
	4	Li, P., Zhao, Z., Li, Z.B. and Wang, N.J., 2002. Research on root distribution parameters of Robinia pseudoacacia on different sites in Chunhua County. Journal of Nanjing Forestry University (Natural Sciences Edition), 26(5): 32-36 (in Chinese with English abstract).
	5	Cao, Y., Zhao, Z., Qu, M., Cheng, X.R. and D.H., W., 2006. Effects of Robinia pseudoacacia roots on deep soil moisture status. Chinese Journal of Applied Ecology, 17(5): 765-768 (in Chinese with English abstract).
	6	Chen, W.Q., Li, P. and Zhang, L.E., 2009. Researches on fine root dynamics in Robinia pseudoacacia forest and its response with soil moisture. Research of Soil and Water Conservation, 16(6): 92-101 (in Chinese with English abstract).
	7	Hu, X.N. et al., 2010. A Model for Fine Root Growth of Robinia pseudoacacia in the Loess Plateau. Scientia Silvae Sinicae, 46(4): 126-132 (in Chinese with English abstract).
	8	Zhang, Z., Huang, M. and Zhang, Y., 2018c. Vertical distribution of fine-root area in relation to stand age and environmental factors in black locust (Robinia pseudoacacia) forests of the Chinese Loess Plateau. Canadian Journal of Forest Research, 48(10): 1148-1158.
	Year	Title	Site	Profile depth (cm)	Wilting point (%)	Stable field capacity (%)	Stand age (years)
Soil water (SW)	2008	Effects of deep soil desiccation on artificial forestlands in different vegetation zones on the Loess Plateau of China	Changwu	800	14	21	20, 20, 23, 30
	2017	Soil moisture decline due to afforestation across the Loess Plateau, China	Yongshou	500	15	21	5, 10,21, 35
	2021	Precipitation dominates the transpiration of both the economic forest (Malus pumila) and ecological forest (Robinia pseudoacacia) on the Loess Plateau after about 15 years of water depletion in deep soil	Yanan	2300	6	12	16

## Sheet: 3_sythesis_SW
Yongshou	SDI = (SW-WP)/(SFC-WP)											DSL
Z (cm)	BL 5 yr	BL 10yr	BL 21yr	BL 35yr							Z (cm)	5	10	21	35
20	1.50423	1.18194	1.20276	1.01567							20	0	0	0	0
40	1.5254	1.31753	1.42149	1.45268							40	0	0	0	0
60	2.23271	1.48428	1.58819	1.64019							60	0	0	0	0
80	1.98363	1.53665	1.54705	1.69258							80	0	0	0	0
100	2.15039	1.77614	1.83857	1.90088							100	0	0	0	0
120	2.15078	1.61023	1.88049	1.92208							120	0	0	0	0
140	2.23437	1.46514	1.63146	1.86013							140	0	0	0	0
160	2.06847	0.779495	1.64228	1.7358							160	0	1	0	0
180	1.8402	0.727943	0.623978	1.26848							180	0	1	1	0
200	1.73666	0.426897	0.562031	0.957025							200	0	1	1	1
220	1.46681	0.656008	0.448094	0.884697							220	0	1	1	1
240	1.38405	0.562846	0.427712	0.822749							240	0	1	1	1
260	1.34293	0.604848	0.459334	0.802338							260	0	1	1	1
280	1.19778	0.657245	0.272647	0.813169							280	0	1	1	1
300	1.26059	0.699247	0.189909	0.668062							300	0	1	1	1
320	1.6976	0.647695	0.450205	0.55414							320	0	1	1	1
340	1.66681	0.616888	0.450613	0.564914							340	0	1	1	1
360	1.8647	0.73167	0.419821	0.627735							360	0	1	1	1
380	2.03146	0.784037	0.461809	0.586548							380	0	1	1	1
400	1.88635	0.742938	0.410271	0.53501							400	0	1	1	1
420	1.88676	0.649762	0.493809	0.597773							420	0	1	1	1
440	1.74167	0.546235	0.37993	0.577434							440	0	1	1	1
460	1.67971	0.598588	0.411493	0.515443							460	0	1	1	1
480	1.78406	0.827728	0.35997	0.505499							480	0	1	1	1
500	1.99237	0.9321	0.412352	0.505907							500	0	1	1	1
											DSLT (cm)	0	360	340	320
											DSLFD (cm)	0	160	180	200
											DSLBD (cm)	0	500	500	500
Changwu	SDI = (SW-WP)/(SFC-WP)
Z (cm)	23yr BL highland	Z (cm)	30 yr BL North	Z (cm)	20 yr BL Norht	Z (cm)	20 yr BL South				Z (cm)	23yr BL highland	Z (cm)	30 yr BL North	Z (cm)	20 yr BL Norht	Z (cm)	20 yr BL South
20.5411	1.14591	15.2908	1.5972	20.3878	1.36769	14.0166	-0.131141				20.5411	0	15.2908	0	20.3878	0	14.0166	1
42.7107	1.22204	39.9507	1.6427	60.2592	0.839396	38.7452	-0.185053				42.7107	0	39.9507	0	60.2592	1	38.7452	1
65.0865	0.999922	57.2983	1.55067	77.6385	0.701474	55.9606	-0.0858972				65.0865	1	57.2983	0	77.6385	1	55.9606	1
102.605	0.303417	76.7555	1.97864	94.9068	0.724153	83.0632	-0.00218818				102.605	1	76.7555	0	94.9068	1	83.0632	1
129.803	0.249468	99.2212	1.6265	117.129	0.723813	100.168	0.257569				129.803	1	99.2212	0	117.129	1	100.168	1
152.041	0.226185	118.805	1.87093	139.077	1.12115	117.346	0.410258				152.041	1	118.805	0	139.077	0	117.346	1
159.38	0.325491	141.017	1.88588	151.163	1.4957	134.593	0.463527				159.38	1	141.017	0	151.163	0	134.593	1
179.091	0.386371	175.903	1.42649	173.508	1.31946	161.738	0.486055				179.091	1	175.903	0	173.508	0	161.738	1
193.8	0.539098	196.016	0.906148	190.924	1.12801	171.509	0.638857				193.8	1	196.016	1	190.924	0	171.509	1
220.982	0.508091	215.811	0.844665	212.887	1.5024	193.747	0.615574				220.982	1	215.811	1	212.887	0	193.747	1
243.199	0.515399	238.118	0.721962	235.215	1.34911	211.179	0.401175				243.199	1	238.118	1	235.215	0	211.179	1
265.443	0.484469	252.595	1.21119	260.404	0.62985	237.949	0.966688				265.443	1	252.595	0	260.404	1	237.949	1
285.201	0.476519	275.034	0.897292	280.12	0.683082	253.123	0.446419				285.201	1	275.034	1	280.12	1	253.123	1
300.038	0.445701	292.434	0.728779	297.436	0.636931	275.409	0.354307				300.038	1	292.434	1	297.436	1	275.409	1
322.234	0.4836	319.622	0.690125	315.127	0.0477955	292.868	0.101669				322.234	1	319.622	1	315.127	1	292.868	1
339.518	0.483336	339.565	0.414506	332.353	0.131656	317.412	0.315427				339.518	1	339.565	1	332.353	1	317.412	1
356.844	0.42189	359.451	0.223012	359.546	0.0853541	337.07	0.452783				356.844	1	359.451	1	359.546	1	337.07	1
381.53	0.42916	381.657	0.245616	374.25	0.245729	359.673	-0.0981902				381.53	1	381.657	1	374.25	1	359.673	1
401.231	0.505334	416.374	0.0309518	398.984	0.18417	374.541	-0.174894				401.231	1	416.374	1	398.984	1	374.541	1
421.259	0.107353	431.141	0.0995543	418.557	0.443889	399.253	-0.205862				421.259	1	431.141	1	418.557	1	399.253	1
443.26	0.428216	458.339	0.0456051	430.85	0.520177	418.996	-0.190869				443.26	1	458.339	1	430.85	1	418.996	1
455.568	0.481561	477.981	0.205904	448.272	0.321073	438.712	-0.137637				455.568	1	477.981	1	448.272	1	438.712	1
482.734	0.473497	502.583	0.335537	473.043	0.20598	455.896	0.00740446				482.734	1	502.583	1	473.043	1	455.896	1
504.957	0.473158	529.633	0.495723	497.697	0.259136	475.644	0.01475				504.957	1	529.633	1	497.697	1	475.644	1
527.264	0.350455	556.762	0.541194	514.95	0.304758	497.888	-0.0161806				527.264	1	556.762	1	514.95	1	497.888	1
554.488	0.258267	596.252	0.563532	522.304	0.381121	522.262	0.442303				554.488	1	596.252	1	522.304	1	522.262	1
581.628	0.288443	613.6	0.471496	556.873	0.380592	537.114	0.388542				581.628	1	613.6	1	556.873	1	537.114	1
615.868	0.76207	635.796	0.509394	576.531	0.517948	561.848	0.326983				615.868	1	635.796	1	576.531	1	561.848	1
645.614	0.593368	655.481	0.608512	603.644	0.586362	579.095	0.380252				645.614	1	655.481	1	603.644	1	579.095	1
675.202	0.654096	697.488	0.561984	628.277	0.670109	596.21	0.624714				675.202	1	697.488	1	628.277	1	596.21	1
694.903	0.730271	712.366	0.469985	645.519	0.731026	613.674	0.364428				694.903	1	712.366	1	645.519	1	613.674	1
714.629	0.768207	746.898	0.52299	675.213	0.638801	635.923	0.32585				714.629	1	746.898	1	675.213	1	635.923	1
734.399	0.744962	764.309	0.339182	692.497	0.638536	653.128	0.440301				734.399	1	764.309	1	692.497	1	653.128	1
754.041	0.905261	796.376	0.384577	712.329	0.523519	672.844	0.493533				754.041	1	796.376	1	712.329	1	672.844	1
768.819	0.958568		-1.28571	731.993	0.653227	700.079	0.38605				768.819	1			731.993	1	700.079	1
798.438	0.97341		-1.28571	746.898	0.52299	710.299	-0.111201				798.438	1			746.898	1	710.299	1
				771.595	0.514965	730.222	-0.356229								771.595	1	730.222	1
				791.369	0.484072	747.469	-0.302959								791.369	1	747.469	1
				808.526	0.667352	764.732	-0.272633								808.526	1	764.732	1
				833.35	0.475782	801.743	-0.234961								833.35	1	801.743	1
				848.276	0.314954										848.276	1
											DSLT (cm)	733.352		600.361		587.872		787.726
											DSLFD (cm)	65		196		260		0
											DSLBD (cm)	798.352		796.361		847.872		787.726
Yanan	SDI = (SW-WP)/(SFC-WP)
Z (cm)	16yr BL										Z (cm)	SDI (%)
26.0891	1.5383										26.0891	0
49.2075	1.37518										49.2075	0
60.4912	1.21206										60.4912	0
100.93	0.885815										100.93	1
124.145	0.885815										124.145	1
158.81	0.885815										158.81	1
164.368	0.885815										164.368	1
210.485	1.04894										210.485	0
233.652	1.04894										233.652	0
245.487	1.04894										245.487	0
257.177	0.885815										257.177	1
280.32	0.885815										280.32	1
303.223	0.722693										303.223	1
349.196	0.722693										349.196	1
395.241	0.885815										395.241	1
424.013	0.885815										424.013	1
452.714	0.885815										452.714	1
493.225	0.885815										493.225	1
527.699	0.722693										527.699	1
579.59	0.559571										579.59	1
654.695	0.559571										654.695	1
695.158	0.396449										695.158	1
729.919	0.396449										729.919	1
770.383	0.396449										770.383	1
787.488	0.396449										787.488	1
821.986	0.559571										821.986	1
851.165	1.04894										851.165	0
891.796	1.70142										891.796	0
903.439	1.70142										903.439	0
905.188	1.70142										905.188	0
928.546	2.02767										928.546	0
945.244	2.19079										945.244	0
1020.3	1.21206										1020.3	0
1053.43	0.396449										1053.43	1
1076.6	0.233327										1076.6	1
1087.86	0.233327										1087.86	1
1145.5	0.396449										1145.5	1
1151.06	0.396449										1151.06	1
1156.62	0.396449										1156.62	1
1191.07	0.396449										1191.07	1
1225.54	0.559571										1225.54	1
1260.16	0.559571										1260.16	1
1300.81	0.559571										1300.81	1
1352.89	0.559571										1352.89	1
1433.77	0.559571										1433.77	1
1491.63	0.396449										1491.63	1
1561.01	0.396449										1561.01	1
1624.66	-0.0929169										1624.66	1
1665.17	-0.0929169										1665.17	1
1705.52	0.070205										1705.52	1
1757.36	0.559571										1757.36	1
1838.19	0.070205										1838.19	1
1907.4	3.49577										1907.4	0
1970.84	3.33264										1970.84	0
2022.59	1.04894										2022.59	0
2045.51	1.04894										2045.51	0
2091.75	0.722693										2091.75	1
2149.49	0.722693										2149.49	1
2207.27	2.02767										2207.27	0
2247.85	2.51703										2247.85	0
2294.35	2.51703										2294.35	0
2300.37	2.51703										2300.37	0
											DSLT (cm)	1737
											DSLFD (cm)	101
											DSLBD (cm)	1838

## Sheet: 3_synthesis_FR
	Paper No.
Cumulative root fraction (%)	1	1	2	2	3	3	4	4	5	5	6	6	7	7	8
Depth (cm)	N	S	Shady	Sunny	N	S	N	S	Shady	Sunny	Shady	Sunny	Shady	Sunny	-
10	17.1871	20.494	24.3276	21.4963	1.35272	5.07773	0.842958	1.30215	1.90835	4.04047	2.14858	8.8817
20	29.7754	33.3009	37.8404	31.2721	9.69549	13.6059	1.94782	4.83657	11.4372	10.8245	9.0535	19.83	33.8605	33.3382	43.0581
30	42.0744	48.0949	46.3632	42.2604	16.4199	21.3287	6.13646	8.87589	18.4347	20.4447	16.8163	26.6611
40	52.8766	58.0863	51.2041	52.6795	25.8295	31.0088	18.2634	11.8257	27.1325	29.8672	24.0864	30.8969	52.0928	47.6175	56.6159
50	61.122	65.8036	57.783	59.0099	34.5017	43.267	30.0299	37.8687	37.4645	41.4257	37.1461	34.2542
60	66.238	67.9926	63.1442	63.9506	47.19	57.7452	39.5304	70.7414	48.4097	52.8176	47.9607	47.9218	63.8561	59.0444	66.1948
70	71.4227	72.8537	69.0206	70.0261	57.231	66.497	47.534	88.2275	58.6002	61.9643	57.2874	56.3439
80	76.5445	76.7447	75.1004	74.8314	63.9511	73.2916	73.0031	92.0542	66.6799	68.5316	64.6079	63.2502	73.9367	68.7661	77.5644
90	83.1281	82.9135	78.2133	84.4558	69.3895	79.0404	74.7344	92.7186	72.5993	74.9846	69.725	69.2292
100	87.5627	87.8805	82.9887	86.9373	73.6901	88.9777	76.2704	94.6054	76.9667	81.3996	74.7842	75.8511	80.6485	76.4744	82.8027
110	90.8963	91.8615	84.8007	96.1325	77.4812	92.6406	79.983	95.6949	81.6548	85.9421	79.5484	79.2885
120	92.7455	95.0413	86.831	97.2346	81.1562	95.0173	84.2313	97.7677	85.154	89.052	83.4202	84.3995	86.2381	82.8786	89.6486
130	94.5799	97.7867	90.601	98.0346	83.2245	95.7555	93.1746	98.7244	87.9262	90.9589	85.7273	86.6694
140	95.7313	98.7918	92.1997	98.8184	85.1912	96.7509	93.732	99.7874	89.8639	92.3631	86.821	89.7296	89.8937	87.9987	92.2074
150	97.1245	99.6578	93.7913	99.4668	87.3901	98.8256	94.6055	99.9203	92.0106	97.6102	89.57	89.8995
160	98.1996	99.8374	96.9475	99.6493	89.1042	99.6141	95.0993	100	93.7471	98.4539	92.2219	93.314	93.2049	93.2225	94.4134
170	98.3363	100	98.5466	99.7188	90.9272	99.698	95.9113	100	94.9116	98.9541	94.2618	94.673
180	98.9525	100	99.9269	99.7878	93.0564	99.698	96.9455	100	96.2683	99.1443	96.6014	95.0057	96.1389	96.6778	98.0217
190	100	100	100	99.9304	98.6734	99.9161	99.7254	100	99.0476	99.6197	99.9211	99.7113
200	100	100	100	100	100	100	100	100	100	100	100	100	100	100	100

## Sheet: 01-Zhao
Fine root biomass density (kg·m-3)
Distance from the trunk (m)	0.5	0.5	1.5	1.5		Average			Cumulative fraction (%)
Aspect	Shady	Sunny	Shady	Sunny		N	S		N	S
10	0.502597	0.292208	0.58413	0.30991		0.543363	0.301059		17.1871	20.494
20	0.514286	0.237662	0.281666	0.138608		0.397976	0.188135		29.7754	33.3009
30	0.412987	0.276623	0.364666	0.158026		0.388826	0.217325		42.0744	48.0949
40	0.354545	0.155844	0.328475	0.137706		0.34151	0.146775		52.8766	58.0863
50	0.268831	0.0974026	0.252521	0.129332		0.260676	0.113367		61.122	65.8036
60	0.206494	0.0506494	0.116984	0.013664		0.161739	0.0321567		66.238	67.9926
70	0.167532	0.0779221	0.160295	0.0648977		0.163913	0.0714099		71.4227	72.8537
80	0.144156	0.0896104	0.179688	0.024708		0.161922	0.0571592		76.5445	76.7447
90	0.268831	0.0974026	0.147446	0.0838393		0.208139	0.090621		83.1281	82.9135
100	0.0857143	0.0545455	0.194681	0.0913858		0.140198	0.0729656		87.5627	87.8805
110	0.167532	0.0896104	0.0432484	0.0273531		0.10539	0.0584818		90.8963	91.8615
120	0.0662338	0.0506494	0.0506947	0.0427721		0.0584642	0.0467107		92.7455	95.0413
130	0.0935065	0.0701299	0.0224767	0.0105301		0.0579916	0.04033		94.5799	97.7867
140	0.0467532	0.0233766	0.0260493	0.00615507		0.0364013	0.0147658		95.7313	98.7918
150	0.0545455	0.00779221	0.0335457	0.0176504		0.0440456	0.0127213		97.1245	99.6578
160	0.0428571	0	0.0251217	0.00527756		0.0339894	0.00263878		98.1996	99.8374
170	0.00779221	0	0.000852433	0.00477613		0.00432232	0.00238806		98.3363	100
180	0.038961	0	0	0		0.0194805	0		98.9525	100
190	0.0662338	0	0	0		0.0331169	0		100	100
						3.16146	1.46901

## Sheet: 02-Li
Cunmulative root biomass fraction (%)
	No.	1	1	1	1	2	2	2	2	3	3	3	3	4	4	4	4
	Classification	<1mm	<3mm	<1mm	<3mm	<1mm	<3mm	<1mm	<3mm	<1mm	<3mm	<1mm	<3mm	<1mm	<3mm	<1mm	<3mm
	Distance from the trunk (m)	0.5	0.5	1.5	1.5	0.5	0.5	1.5	1.5	0.5	0.5	1.5	1.5	0.5	0.5	1.5	1.5				<1 mm	<1 mm
	Aspect	Shady	Shady	Shady	Shady	Sunny	Sunny	Sunny	Sunny	Shady	Shady	Shady	Shady	Sunny	Sunny	Sunny	Sunny			Depth (cm)	Shady	Sunny
	10	37.069	20.977	45.1149	29.5977	16.651	13.7286	44.1375	33.319	3.77111	3.19049	11.3552	6.98049	9.10215	8.19202	16.0947	7.58412			10	24.3276	21.4963
	20	50.8621	32.1839	61.4943	40.5172	29.207	39.1522	55.8179	43.2449	18.3365	25.9173	20.6688	20.0833	13.3454	14.8643	26.7183	20.0306			20	37.8404	31.2721
	30	58.046	47.1264	73.2759	54.023	36.2137	47.3246	65.7461	55.5116	27.9408	39.8939	26.19	32.6046	23.6616	26.7046	43.42	37.9498			30	46.3632	42.2604
	40	62.931	55.1724	77.8736	67.5287	46.1412	58.1285	76.5501	66.0231	37.2528	48.3329	26.7591	39.8767	33.6799	42.7967	54.3467	53.4357			40	51.2041	52.6795
	50	68.9655	62.6437	83.908	78.1609	49.9254	63.0846	84.1377	76.8278	43.6502	52.3931	34.6084	45.6926	38.829	54.6369	63.1475	59.8015			50	57.783	59.0099
	60	73.5632	66.092	86.2069	78.1609	54.0035	70.0866	86.1713	84.9995	48.8823	63.4617	43.9245	59.3785	45.503	65.5645	70.1246	65.2597			60	63.1442	63.9506
	70	74.1379	68.9655	90.8046	83.908	57.2044	72.7051	89.3738	89.9571	59.0664	70.1482	52.0736	66.9421	51.2609	72.2342	82.2654	73.4526			70	69.0206	70.0261
	80	79.8851	74.7126	94.8276	84.4828	58.6541	74.4425	92.2808	97.5439	67.218	80.0399	58.471	69.5511	59.7586	77.6933	88.632	80.4279			80	75.1004	74.8314
	90	83.6207	78.7356	94.5402	90.2299	88.7552	90.805	94.0198	98.1133	71.573	84.4031	63.1192	77.6978	63.0857	80.4108	91.9625	88.0095			90	78.2133	84.4558
	100	87.6437	81.8966	97.9885	98.2759	90.4949	91.6645	93.4219	98.6827	77.3881	86.4275	68.9344	82.0536	67.0241	82.219	96.8085	96.2015			100	82.9887	86.9373
	110	88.5057	87.3563	97.7011	99.1379	93.1134	93.9913	96.916	99.2559	82.6202	92.8273	70.3756	83.7872	96.4909	98.3137	98.0097	98.3145			110	84.8007	96.1325
	120	89.0805	89.3678	97.9885	98.8506	94.8523	94.8523	97.4854	99.5399	88.1447	96.0154	72.1101	87.8531	97.996	98.6013	98.6048	98.2965			120	86.831	97.2346
	130	90.2299	93.9655	99.7126	99.7126	96.8837	98.3472	97.47	100	95.7058	99.205	76.7558	94.2522	98.5893	98.5841	99.1955	99.4986			130	90.601	98.0346
	140	89.9425	95.4023	100	100	96.8699	98.6234	98.9189	100	98.3206	100	80.5359	98.0241	99.4848	98.8778	100	99.484			140	92.1997	98.8184
	150	90.5172	95.1149	100	100	98.318	99.7776	99.7761	100	99.1747	100	85.4732	99.4687	99.7733	99.7725	100	99.7733			150	93.7913	99.4668
	160	100	100	100	100	98.5973	100	100	100	100	100	87.7899	100	100	100	100	100			160	96.9475	99.6493
	170	100	100	100	100	98.8751	100	100	100	100	100	94.1865	100	100	100	100	100			170	98.5466	99.7188
	180	100	100	100	100	99.1513	100	100	100	100	100	99.7076	100	100	100	100	100			180	99.9269	99.7878
	190	100	100	100	100	99.7215	100	100	100	100	100	100	100	100	100	100	100			190	100	99.9304
	200	100	100	100	100	100	100	100	100	100	100	100	100	100	100	100	100			200	100	100

## Sheet: 03-Xue
Fine root surface area of unit volume(m2 m-3)
	Distance from the trunk (m)	0.5	0.5	1	1	1.5	1.5	2	2	2.5	2.5		Average
Fine root length (m)	Soil Depth (cm)	North facing site	South facing site	North facing site	South facing site	North facing site	South facing site	North facing site	South facing site	North facing site	South facing site		North facing site	South facing site
	10	0.41	3.12	2.46	1.13	2.3	0.24	0.49	0.89	3.66	3.7		1.864	1.816		1.35272	5.07773
	20	9.59	3.94	15.78	5.36	8.48	4.18	16.23	0.61	7.4	1.16		11.496	3.05		9.69549	13.6059
	30	11.74	5.49	3.29	3.64	6.25	2.41	13.9	2.16	11.15	0.11		9.266	2.762		16.4199	21.3287
	40	11.95	2.37	11.34	2.05	18.38	5.98	10.27	4.36	12.89	2.55		12.966	3.462		25.8295	31.0088
	50	14.22	6.99	16.81	4.98	9.3	4.7	10.98	3.56	8.44	1.69		11.95	4.384		34.5017	43.267
	60	22.56	9.73	12.17	5.18	26.02	3.07	18.18	1.59	8.49	6.32		17.484	5.178		47.19	57.7452
	70	16.49	2.47	18.58	3.11	12.98	6.45	9.38	2.68	11.75	0.94		13.836	3.13		57.231	66.497
	80	13.2	2.53	10.56	4.13	10.94	1.37	4.1	1.14	7.5	2.98		9.26	2.43		63.9511	73.2916
	90	14.24	3.76	9.06	1.41	5.38	0.5	2.7	3.8	6.09	0.81		7.494	2.056		69.3895	79.0404
	100	7.46	9.75	3.46	2.3	9.54	1.46	5.33	1.28	3.84	2.98		5.926	3.554		73.6901	88.9777
	110	5.7	2.05	8.71	1.22	3.2	0.28	4.4	1.1	4.11	1.9		5.224	1.31		77.4812	92.6406
	120	2.27	2.34	5.9	0.75	8.06	0.75	5.33	0.41	3.76	0		5.064	0.85		81.1562	95.0173
	130	5.34	0.26	3.72	0.91	0.5	0.15	3.51	0	1.18	0		2.85	0.264		83.2245	95.7555
	140	4.16	0.52	5.45	1.18	1.01	0	1.75	0.08	1.18	0		2.71	0.356		85.1912	96.7509
	150	4.49	1.4	6.28	1.49	2.23	0.82	0.81	0	1.34	0		3.03	0.742		87.3901	98.8256
	160	2.27	0.56	1.89	0.4	2.91	0.45	4.12	0	0.62	0		2.362	0.282		89.1042	99.6141
	170	4.45	0.15	2.77	0	1.11	0	1.76	0	2.47	0		2.512	0.03		90.9272	99.698
	180	0	0	4.08	0	2.28	0	2.63	0	5.68	0		2.934	0		93.0564	99.698
	190	11.2	0.26	4.74	0.13	6.75	0	4.29	0	11.72	0		7.74	0.078		98.6734	99.9161
	200	1.98	0.12	0.58	0	2.74		3.84	0	0	0		1.828	0.03		100	100
													137.796	35.764
	Distance from the trunk (m)	0.5	0.5	1	1	1.5	1.5	2	2	2.5	2.5		Average
	Soil Depth (cm)	North facing site	South facing site	North facing site	South facing site	North facing site	South facing site	North facing site	South facing site	North facing site	South facing site		North facing site	South facing site
	10	8.65	68.91	19.62	12.29	23.61	9.11	8.25	25.62	16.71	8.38		15.368	24.862
	20	57.45	84.3	113.44	94.18	99.58	84.77	29.25	20.05	56.42	38.21		71.228	64.302
	30	114.22	81.96	43.94	17.72	77.47	22.81	137.68	32.6	86.2	9.86		91.902	32.99
	40	115.38	95.39	87.93	91.05	125	117.1	114.77	77.08	151.17	40.85		118.85	84.294
	50	166.61	137.45	153.24	120.54	132.9	135.68	120.54	100.86	136.35	35.07		141.928	105.92
	60	175.14	151.11	134	106.13	161.41	58.23	165.83	61.59	109.07	86.31		149.09	92.674
	70	179.68	58.74	163.3	54.05	164.95	112.7	110.58	70.65	134.26	37.69		150.554	66.766
	80	163.58	90.38	125.11	72.12	103.17	67.46	114.55	41.54	116.44	70.07		124.57	68.314
	90	98.49	109.77	172.78	49.04	94.45	11.35	77.72	68.85	109.71	37.7		110.63	55.342
	100	82.27	95.61	59.98	78.24	178.39	54.68	60.73	30.23	81.05	39.19		92.484	59.59
	110	51.12	49.01	124.42	31.45	62.98	10.33	71.54	25.96	81.51	29.92		78.314	29.334
	120	41.99	95.22	68.88	11.25	75.87	59.72	77.81	19.49	50.53	0		63.016	37.136
	130	77.06	8.75	82	37.21	13.27	10.01	56.6	0	22.9	0		50.366	11.194
	140	40.76	16.44	87.3	54.77	27.78	0	59.5	9.19	12.31	0		45.53	16.08
	150	51.47	25.81	48.21	36.92	39.66	20.35	36.39	0	20.86	0		39.318	16.616
	160	49.61	25.32	30.07	36.25	34.78	10.39	47.56	0	22.4	0		36.884	14.392
	170	31.1	8.39	84.2	0	35.45	0	24.2	0	96.1	0		54.21	1.678
	180	0	0	45.5	0	46.75	0	27.05	0	85.84	0		41.028	0
	190	44.3	11.93	32.59	16.84	80.88	0	94.76	0	59.69	0		62.444	5.754
	200	26.37	15.92	102.17	0	83.87	0	86.67	0	0	0		59.816	3.184

## Sheet: 04-Li
Fine root biomass density (g·cm-3)
Soil Depth (cm)	Northern slope						Southern slope					Northern slope	Southern slope
Distance from the trunk (m)	3	2.5	2	1.5	1	0.5	2.5	2	1.5	1	0.5	Average	Average
10	0.000218147	0.000218217	0.000163742	0.000163707	3.63988e-05	3.63636e-05	0.000371517	0.000346749	0.000346749	9.90712e-05	4.95356e-05	0.000139429	0.000242724		0.842958	1.30215
20	0.000437348	0.000146404	0.000164551	0.000128152	0.000146369	7.36768e-05	0.000842105	0.000767802	0.000767802	0.000842105	7.43034e-05	0.00018275	0.000658824		1.94782	4.83657
30	0.00109281	0.00102008	0.00100193	0.000656445	0.000365535	2.0116e-05	0.00133746	0.000916409	0.000767802	0.000693499	4.95356e-05	0.000692819	0.000752941		6.13646	8.87589
40	0.00340278	0.00342107	0.00291194	0.00200274	0.000166415	0.000130157	0.000916409	0.000842105	0.000619195	0.00022291	0.000148607	0.00200585	0.000549845		18.2634	11.8257
50	0.00309474	0.0024402	0.00198562	0.0016038	0.0013674	0.00118562	0.00512693	0.00497833	0.00487926	0.00703406	0.00225387	0.00194623	0.00485449		30.0299	37.8687
60	0.00185936	0.00180471	0.00158657	0.00149569	0.00140475	0.00127747	0.00713313	0.00686068	0.00703406	0.00272446	0.00688545	0.00157142	0.00612756		39.5304	70.7414
70	0.00186017	0.00176926	0.00171479	0.00158748	0.000642061	0.000369263	0.00468111	0.00448297	0.00386378	0.000173375	0.00309598	0.00132384	0.00325944		47.534	88.2275
80	0.0053521	0.00524301	0.00506119	0.00475203	0.00457032	0.000297556	0.00168421	0.00111455	0.000520124	9.90712e-05	0.000148607	0.0042127	0.000713312		73.0031	92.0542
90	0.000516687	0.000480324	0.000262177	0.000207667	0.000207561	4.37841e-05	0.000272446	9.90712e-05	4.95356e-05	0.000148607	4.95356e-05	0.000286367	0.000123839		74.7344	92.7186
100	0.000444874	0.000408511	0.000354071	0.000172428	0.000135854	8.65131e-06	0.000569659	0.000544892	0.000247678	4.95356e-05	0.000346749	0.000254065	0.000351703		76.2704	94.6054
110	0.00128236	0.00122782	0.000882328	0.000209636	8.23281e-05	0	0.000470588	0.000396285	7.43034e-05	0	7.43034e-05	0.000614079	0.000203096		79.983	95.6949
120	0.00142863	0.0013923	0.000792404	0.00030146	0.000301389	0	0.000643963	0.000643963	0.000396285	0	0.000247678	0.000702697	0.000386378		84.2313	97.7677
130	0.00281154	0.00272059	0.00253874	0.000429611	0.000375101	0	0.000247678	0.000272446	0.000297214	0	7.43034e-05	0.00147926	0.000178328		93.1746	98.7244
140	0.000103359	0.000139793	0.000121575	0.000121435	6.69949e-05	0	0.000297214	0.000198142	0.000272446	0	0.00022291	9.21927e-05	0.000198142		93.732	99.7874
150	0.000158818	0.000195182	0.000213364	0.000140707	0.000158854	0	4.95356e-05	2.47678e-05	0	0	4.95356e-05	0.000144487	2.47678e-05		94.6055	99.9203
160	0.000105258	0.000159838	6.8894e-05	8.71109e-05	6.89291e-05	0	2.47678e-05	2.47678e-05	0	0	2.47678e-05	8.16716e-05	1.48607e-05		95.0993	100
170	0.000270652	0.000234394	8.80605e-05	0.000124635	8.80605e-05	0						0.0001343			95.9113	100
180	0.00019796	0.00019796	0.000234465	0.00019796	0.000198066	0						0.000171069			96.9455	100
190	0.000944435	0.000835344	0.00088996	7.18481e-05	1.72323e-05	0						0.000459803			99.7254	100
200	5.45103e-05	0.000109091	0	3.62933e-05	7.26569e-05	0						4.54252e-05			100	100
												0.0165405	0.0186402

## Sheet: 05-Cao
Fine root surface area of unit volume (cm2 dm-3)
	Distance from the trunk (m)	0.5	0.5	1	1	1.5	1.5	2	2		Average
	Aspects	Shady	Sunny	Shady	Sunny	Shady	Sunny	Shady	Sunny		Shady	Sunny		Shady	Sunny
	10	0.986842	2.26974	3.90711	1.10924	0.784412	0.720293	0.566038	0.0943396		1.5611	1.0484		1.90835	4.04047
	20	5.625	2.56579	7.47435	2.81303	4.96711	1.56799	13.1132	0.0943396		7.79491	1.76029		11.4372	10.8245
	30	7.30263	4.44079	3.4999	2.48298	3.69806	1.45724	8.39623	1.60377		5.7242	2.4962		18.4347	20.4447
	40	6.41447	1.08553	7.32182	1.81351	7.17712	3.01274	7.54717	3.86792		7.11515	2.44493		27.1325	29.8672
	50	10.6579	3.75	8.09298	2.07621	7.13215	2.96278	7.92453	3.20755		8.45189	2.99913		37.4645	41.4257
	60	9.67105	5.03289	7.42306	2.84871	9.00325	2.33825	9.71698	1.60377		8.95359	2.95591		48.4097	52.8176
	70	8.19079	1.97368	11.8373	2.17701	8.50529	4.02198	4.81132	1.32075		8.33618	2.37336		58.6002	61.9643
	80	10.3618	2.86184	5.66129	1.67881	7.113	0.766092	3.30189	1.50943		6.60949	1.70404		66.6799	68.5316
	90	6.90789	2.56579	5.75362	1.17838	3.02856	0.783579	3.67925	2.16981		4.84233	1.67439		72.5993	74.9846
	100	3.05921	2.66447	2.71134	1.61057	5.02956	1.43975	3.49057	0.943396		3.57267	1.66455		76.9667	81.3996
	110	4.44079	1.77632	5.43115	1.02495	2.3549	0.686985	3.11321	1.22642		3.83501	1.17867		81.6548	85.9421
	120	2.26974	1.08553	3.152	0.864827	3.00941	1.27738	3.01887	0		2.8625	0.806934		85.154	89.052
	130	2.07237	0.789474	2.65157	0.534328	1.42227	0.655342	2.92453	0		2.26769	0.494786		87.9262	90.9589
	140	2.26974	0.394737	1.98165	0.966965	0.862686	0.0957615	1.22642	0		1.58512	0.364366		89.8639	92.3631
	150	2.56579	1.48026	2.49948	1.48256	1.39312	2.48314	0.566038	0		1.75611	1.36149		92.0106	97.6102
	160	0.690789	0.493421	1.3211	0	1.59464	0.382213	2.07547	0		1.4205	0.218909		93.7471	98.4539
	170	1.77632	0.296053	1.16232	0	0.588725	0.223166	0.283019	0		0.952596	0.129805		94.9116	98.9541
	180	0.296053	0.197368	2.01734	0	1.18245	0	0.943396	0		1.10981	0.049342		96.2683	99.1443
	190	5.82237	0.493421	1.26134	0	0.878508	0	1.13208	0		2.27357	0.123355		99.0476	99.6197
	200	1.48026	0.394737	0.0851893	0	0.701974	0	0.849057	0		0.77912	0.0986843		100	100
	All	92.8618	36.6118	85.2459	24.6621	70.4272	24.8747	78.6793	17.6415		81.8035	25.9475

## Sheet: 06-Chen
Fine root length density (m m-3)						Fine root length density (m m-3)
	Sunny						Shady						Sunny	Shady
classification	d<0.5 mm	0.5-1 mm	1-3 mm	> 3 mm		classification	d<0.5 mm	0.5-1 mm	1-3 mm	> 3 mm			<1 mm	<1 mm		Sunny	Shady
10	98.6118	152.775	220.837	236.109		10	55.3866	94.142	102.425	85.8155			251.387	149.529		8.8817	2.14858
20	112.577	197.302	262.579	261.185		20	187.674	292.867	400.828	414.648			309.879	480.541		19.83	9.0535
30	69.5871	123.761	161.257	193.201		30	217.536	322.707	419.596	425.132			193.348	540.243		26.6611	16.8163
40	47.4414	72.4491	96.0488	202.999		40	208.664	297.292	388.6	435.617			119.891	505.956		30.8969	24.0864
50	39.1816	55.8425	110.016	135.01		50	368.634	540.243	706.381	772.819			95.0241	908.877		34.2542	37.1461
60	153.144	233.701	319.805	375.365		60	329.225	423.41	545.235	592.273			386.845	752.635		47.9218	47.9607
70	99.0467	139.332	211.55	275.437		70	259.452	389.625	519.71	572.285			238.379	649.077		56.3439	57.2874
80	63.0151	132.461	210.232	271.336		80	203.52	305.945	400.131	444.401			195.476	509.465		63.2502	64.6079
90	58.9247	110.304	164.47	175.581		90	133.791	222.331	297.161	311.024			169.229	356.122		69.2292	69.725
100	70.1035	117.322	172.879	267.327		100	135.905	216.184	302.043	321.378			187.425	352.089		75.8511	74.7842
110	32.6695	64.6241	103.507	111.84		110	138.107	193.45	270.983	309.716			97.2936	331.557		79.2885	79.5484
120	52.1951	92.4639	123.024	124.408		120	98.7412	170.715	234.407	253.85			144.659	269.456		84.3995	83.4202
130	30.0385	34.2105	31.4328	80.0429		130	62.2527	98.3053	153.605	142.466			64.249	160.558		86.6694	85.7273
140	25.9453	60.6696	109.285	107.891		140	22.8216	53.2941	64.3453	72.7808			86.6149	76.1157		89.7296	86.821
150	3.78879	1.01922	0	9.35239		150	66.5904	124.723	152.362	160.711			4.80801	191.313		89.8995	89.57
160	37.2111	59.4329	74.7104	112.21		160	74.3284	110.228	160.057	173.985			96.644	184.556		93.314	92.2219
170	17.8432	20.6209	26.1764	60.8979		170	46.0792	95.8858	137.431	134.598			38.4641	141.965		94.673	94.2618
180	5.40324	4.01438	4.03069	4.01981		180	50.9618	111.863	145.038	147.894			9.41762	162.825		95.0057	96.6014
190	42.9759	90.2107	95.7661	154.096		190	80.9329	150.095	188.829	227.628			133.187	231.028		99.7113	99.9211
200	4	4.17202	6.95246	6.9443		200	5.49289	0	0	8.26113			8.17202	5.49289		100	100
													2830.39	6959.4
	The same datasets of 04-Li

[truncated: 2 more sheets: 07-Hu, 08-Zhang]
